# Supplementary material
Source: PubMed Central journal article supplement (PMC7936353)
Supplement: pnas.2016072118.sapp.pdf [file pnas.2016072118.sapp.pdf]

## Supporting Information for

### Title:

A Circulating, Disease-Specific, Mechanism-Linked Biomarker for ATTR Polyneuropathy  
Diagnosis and Response to Therapy Prediction

### Authors and affiliations:

Xin Jiang<sup>a\*</sup>, Richard Labaudinière<sup>a</sup>, Joel N. Buxbaum<sup>a,b</sup>, Cecília Monteiro<sup>b</sup>, Marta Novais<sup>c,d</sup>,  
Teresa Coelho<sup>c,d</sup>, Jeffery W. Kelly<sup>b, e\*</sup>

<sup>a</sup>Protego Biopharma, Inc., CA, USA

<sup>b</sup>Departments of Chemistry and Molecular Medicine, The Scripps Research Institute, CA, USA

<sup>c</sup>Unidade Corino de Andrade, Centro Hospitalar do Porto, Porto, Portugal

<sup>d</sup>Department of Neurophysiology, Centro Hospitalar do Porto, Porto, Portugal

<sup>e</sup>The Skaggs Institute for Chemical Biology, The Scripps Research Institute, CA, USA

\*To whom correspondence should be addressed: [xjiang@protegiobiopharma.com](mailto:xjiang@protegiobiopharma.com),  
[jkelly@scripps.edu](mailto:jkelly@scripps.edu)

### This PDF file includes:

Figure S1. Binding affinity of the anti-NTTTR antibodies

Figure S2. NTTTR levels in post-liver transplant patients

Figure S3. Tafamidis treatment results in NTTTR reduction

Figure S4. Patisiran treatment results in NTTTR reduction

Figure S5. Total TTR ELISA using 6H3, showing a standard curve, Kd value

Figure S6. Male and female baseline NTTTR levels in the R vs NR groups

Figure S7. Baseline NTTTR vs age plot

Figure S8. Assay analytical performance (LLOQ, accuracy, precision)

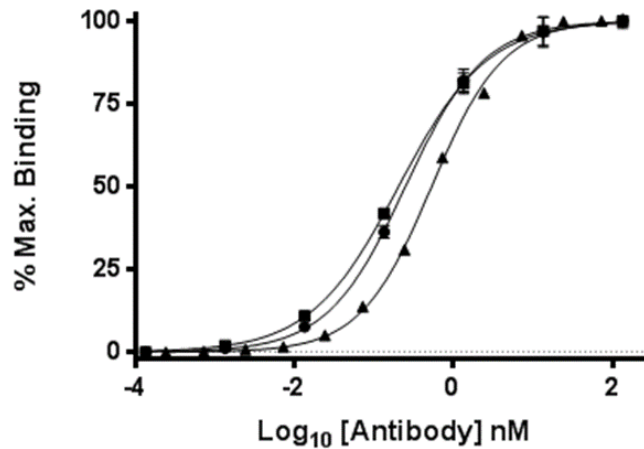

GPTGTGESKC PLMKVLDVAV RGSPAINVAV HVFRKAADDT WEPFASGKTS  
 ESGELHGLTT EEEFVEGIYK VEIDTKSYWK ALGISPFHEH AEVVFTANDS  
 GPRRYTIAAL LSPYSYSTTA VVTNPKE

**Figure S1.** Binding affinity of the anti-NNTTR antibodies

Illustrates the binding affinity of the mouse and rabbit antibodies to the respective peptides containing the corresponding epitopes. Peptide ADDTWEPFASGKT for 4C1 (square,  $K_D = 0.203$  nM), peptide TSESGELHGLTTE for 5D4 (circle,  $K_D = 0.247$  nM), and peptide AALLSPYSYSTTAV for 2504A (triangle,  $K_D = 0.529$  nM). Schematic diagram of the sequence around the epitope region of the antibodies are shown in color.

NeutrAvidin (Pierce, USA; 5  $\mu\text{g}/\text{mL}$ ) in 50 mM sodium carbonate/bicarbonate buffer pH 9.6 was used to coat 96-well Corning high-binding EIA/RIA plates. The plates were washed three times with TBST buffer and blocked with Superblock (Pierce, USA). Biotinylated peptides were diluted with PBS to 2  $\mu\text{g}/\text{mL}$  and 50–100  $\mu\text{L}$  were added to each well and incubated at ambient temperature for one hour. The plates were then washed again with TBST and purified antibody (2  $\mu\text{g}/\text{mL}$ ) was added to the plates. After a one-hour incubation at ambient temperature and washing steps, HRP-conjugated secondary antibody was applied. Goat-anti-mouse IgG or Fc HRP conjugates were used in the case of mouse monoclonal antibodies, whereas goat-anti-rabbit IgG HRP-conjugated antibody was used for rabbit polyclonal detection. TMB was used as the HRP substrate for the detections.

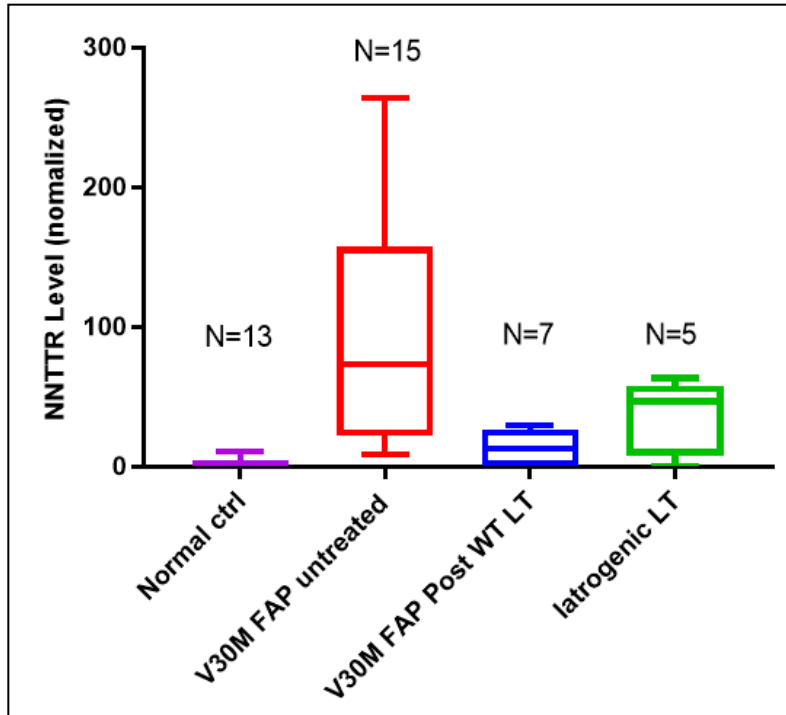

**Figure S2.** NNTTR levels in post-liver transplant (LT) patients

Patient plasma samples were kindly provided by Dr. Yoshi Sekijima at Shinshu University in Japan, in the Department of Medicine (Neurology & Rheumatology). None of the patients was treated with a TTR kinetic stabilizer. Normalized to the V30M TTR FAP pre-treatment level (average set to 100 based on a pooled sample from pre-treatment V30M TTR FAP patients, see Methods section). Comparing to the mean NNTTR level of V30M FAP untreated patients, normal controls have an average NNTTR level of 3.0 ( $p < 0.0001$ ); V30M FAP patients post-wild type (TTR) liver transplant have an average NNTTR level of 13.5 ( $p = 0.0028$ ) and iatrogenic LT patients who have received a WT/V30M heterozygous liver have an average NNTTR level of 35.8 ( $P = 0.064$ ). P values were calculated by 1-way ANOVA Dunnett's multiple comparison test. Note: two outliers were identified in the normal control group automatically using the ROUT method with  $Q = 0.1\%$  (99.9% chance of being true outliers) and were excluded from the comparison. These outliers are likely to be associated with damaged samples caused by repeated freeze/thaw.

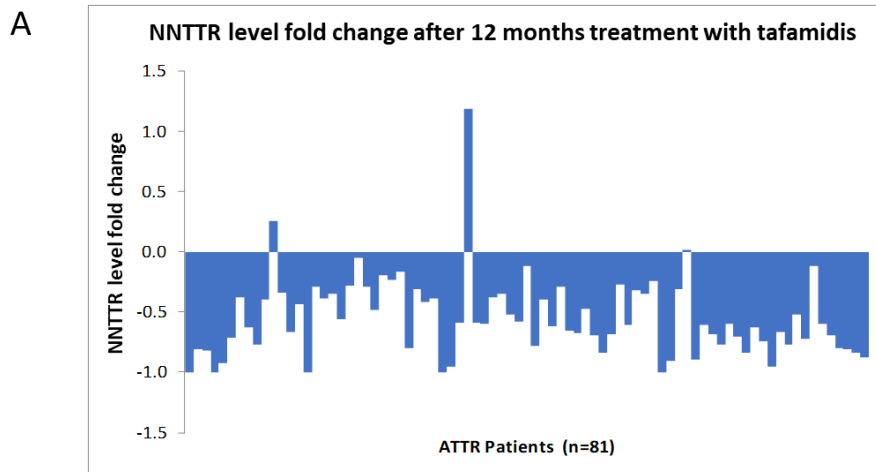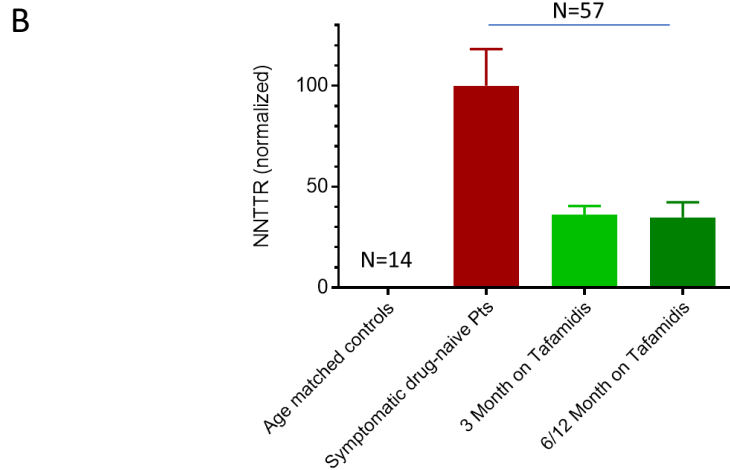

**Figure S3.** NNTTR levels reduced after tafamidis treatment

- (a) NNTTR level reduction is seen in the majority of the individual patients.
- (b) NNTTR levels in age-matched controls (N=14) and ATTR-FAP patients (N=57) pre- and 3- and 6/12 months post tafamidis treatment. Error bars represent SEM. Plasma samples from the Amyloidosis Reference Center in Porto, Portugal.

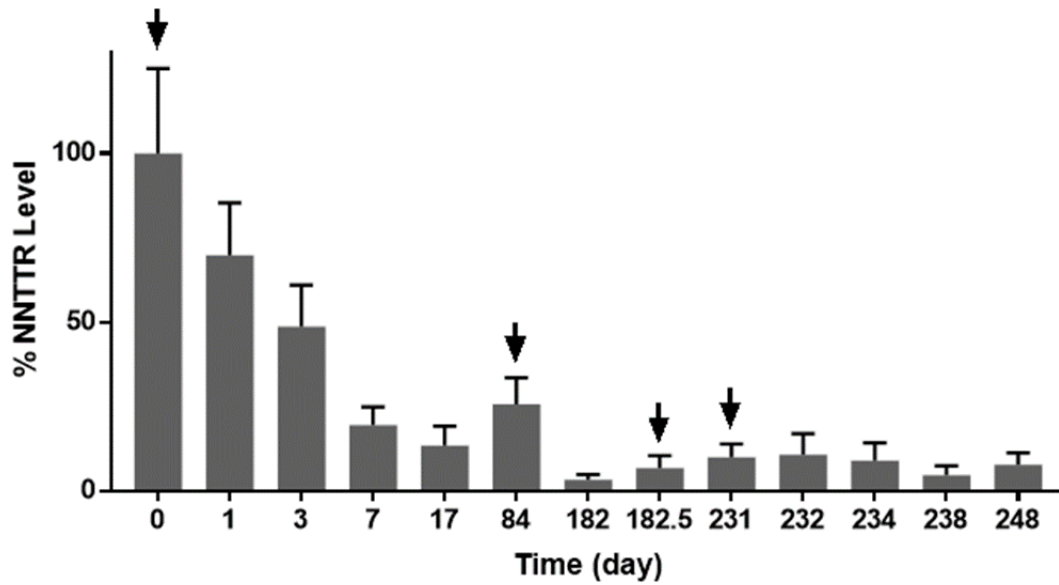

**Figure S4.** Patisiran results in NNTTR reduction

Patisiran patient samples were collected during the ALN-TTR02 clinical trial (ClinicalTrials.gov identifier: NCT01617967) and were provided by Alnylam Pharmaceuticals under a research agreement. Arrows indicate administration of patisiran. Error bars represent SEM.

Also note that none of the 80 plasma samples from 17 healthy controls from the ALN-TTR02 clinical trial (ClinicalTrials.gov identifier: NCT01559077) has any detectable NNTTR levels (data not shown).

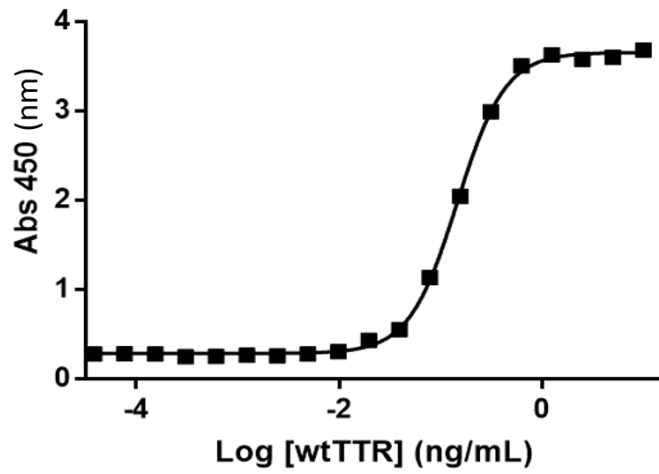

**Figure S5.** Total TTR ELISA using mouse monoclonal antibody 6H3 as the capture antibody and biotinylated 6H3 as the detection antibody, showing a standard curve,  $K_D=0.145$  ng/mL

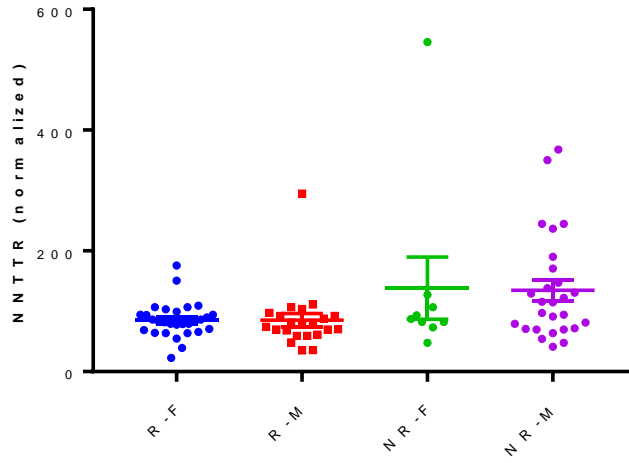

**Figure S6.** Male and female baseline NNTTR levels in the R vs NR groups. Error bars represent SEM.

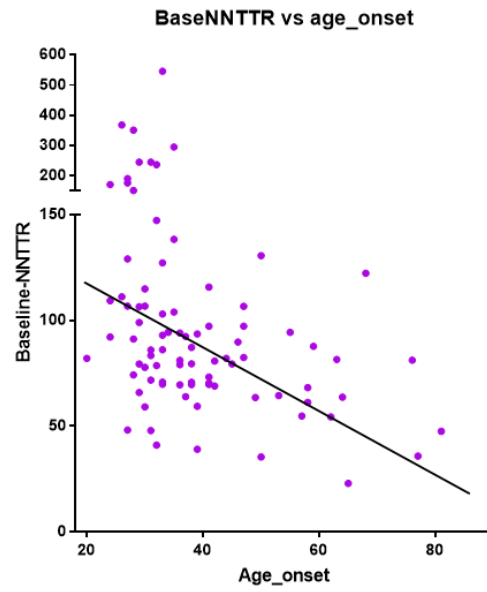

**Figure S7.** Baseline NNTTR vs age plot. An arbitrary age of 50 is used as the cutoff for the “old (>50)” and “young ( $\leq 50$ )” groups.



**Figure S8.** Assay analytical performance (LLOQ, accuracy, precision)

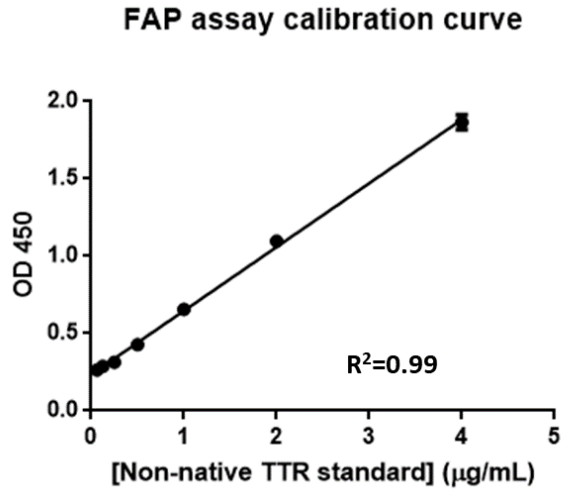

### Accuracy

Four samples were tested with 5 replicates in three separate assays to assess accuracy.

| Actual Value<br>(µg/mL) | Calculated Mean Value |         |         | % Accuracy<br>Range |
|-------------------------|-----------------------|---------|---------|---------------------|
|                         | Assay 1               | Assay 2 | Assay 3 |                     |
| 5                       | 4.44                  | 4.07    | 4.33    | 81.4 - 88.9         |
| 10                      | 8.74                  | 9.67    | 11.05   | 87.4 - 110.5        |
| 40                      | 34.63                 | 39.18   | 37.51   | 86.6 - 97.9         |
| 60                      | 59.08                 | 53.44   | 58.13   | 89.1 - 98.5         |

## Precision

### Intra-assay Precision

Three FAP patient plasma samples were tested twenty times on one plate to assess intra-assay precision.

### Inter-assay Precision

Four samples were tested with 5 replicates in three separate assays to assess inter-assay precision.

|                           | Intra-assay Precision |           |           | Inter-assay Precision |          |          |          |
|---------------------------|-----------------------|-----------|-----------|-----------------------|----------|----------|----------|
| Sample                    | Patient 1             | Patient 2 | Patient 3 | Sample 1              | Sample 2 | Sample 3 | Sample 4 |
| n                         | 20                    | 20        | 20        | 3                     | 3        | 3        | 3        |
| Mean ( $\mu\text{g/mL}$ ) | 5.85                  | 19.46     | 55.55     | 4.28                  | 9.82     | 37.11    | 56.88    |
| Std. deviation            | 0.396                 | 1.522     | 4.146     | 0.19                  | 1.16     | 2.30     | 3.02     |
| CV (%)                    | 6.8%                  | 7.8%      | 7.5%      | 4.5%                  | 11.9%    | 6.2%     | 5.3%     |
